# Supplementary material for: Anti-Obesity Effects of Larval Powder of Steamed and Lyophilized Mature Silkworms in A Newly Designed Adult Mouse Model
Source: Preprints.org preprint supplement (doi:10.20944/preprints202309.1763.v1), 2023-09-27
Supplement: Supplementary file 2 [file supplementary]

Archive with 8 entries (8 files):
- Figure S1.jpg
- Figure S2.jpg
- Figure S3.jpg
- Figure S4.jpg
- Figure S5.jpg
- Figure S6.jpg
- Figure S7.jpg
- Table S1.pdf
