# Supplementary figures and images for: Anti-Obesity Effects of Larval Powder of Steamed and Lyophilized Mature Silkworms in A Newly Designed Adult Mouse Model
Source: Preprints.org preprint supplement (doi:10.20944/preprints202309.1763.v1), 2023-09-27

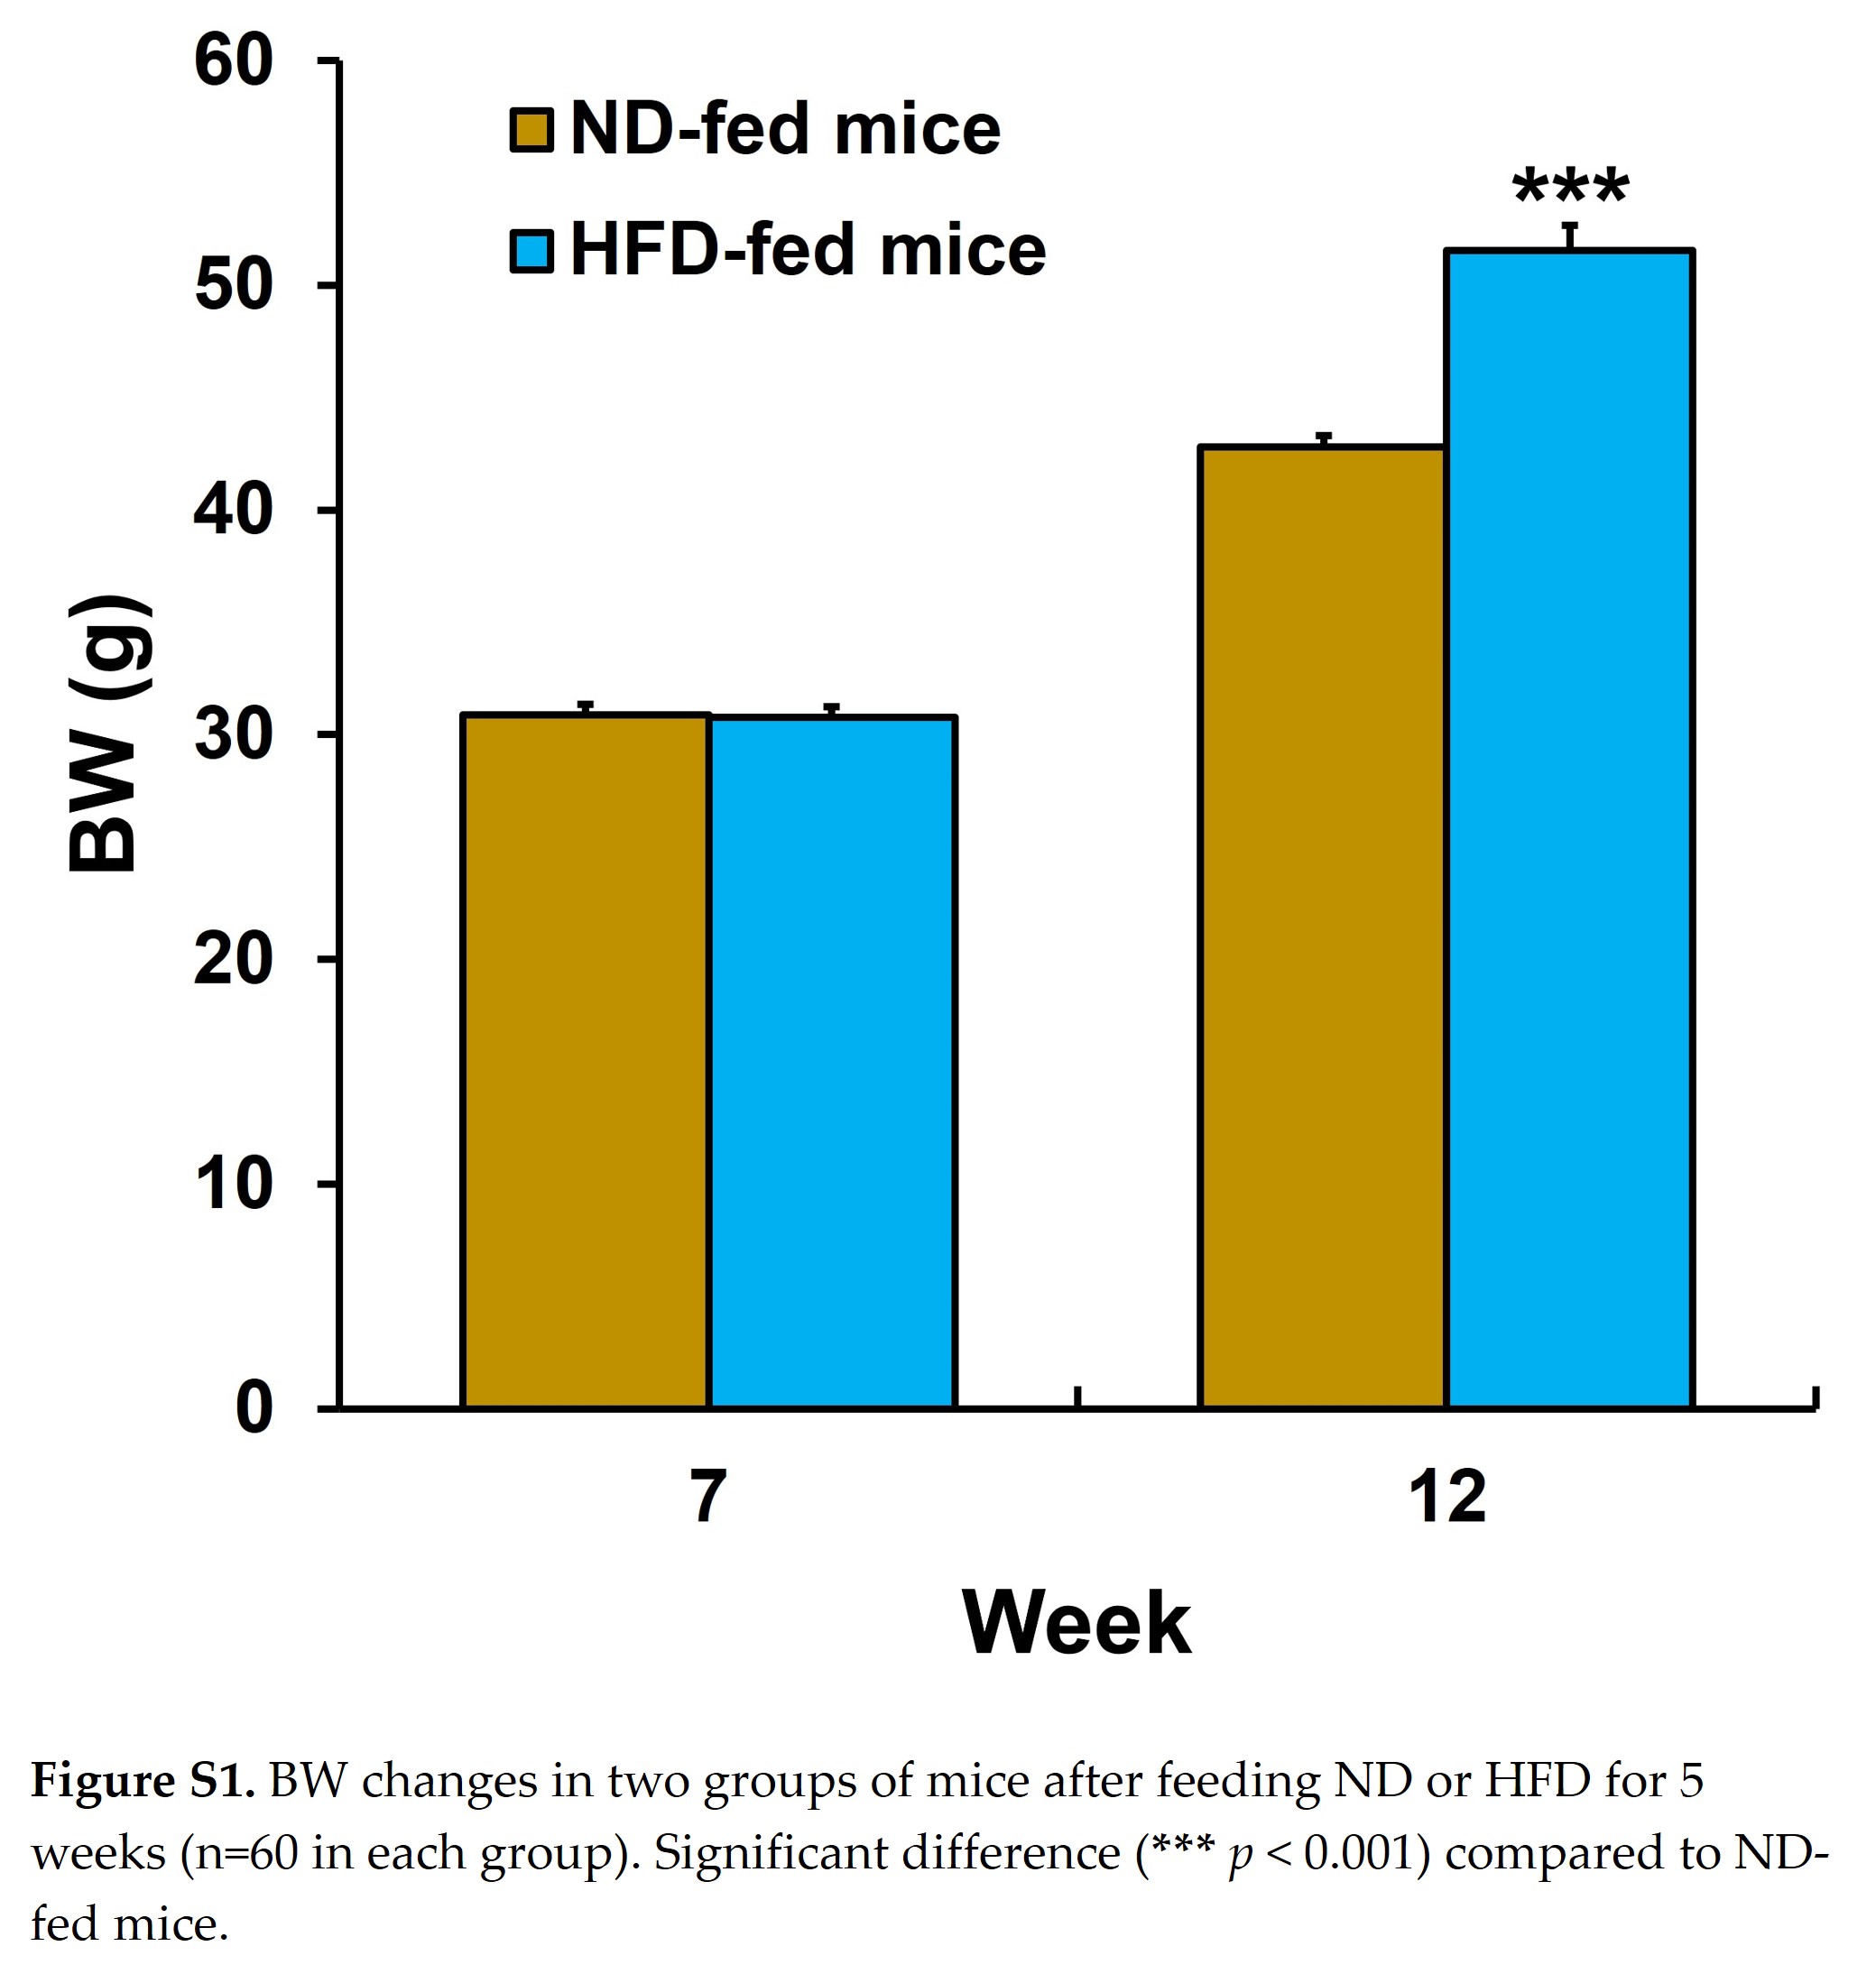

Supplement: Supplementary file 2 [file supplementary › Figure S1.jpg]

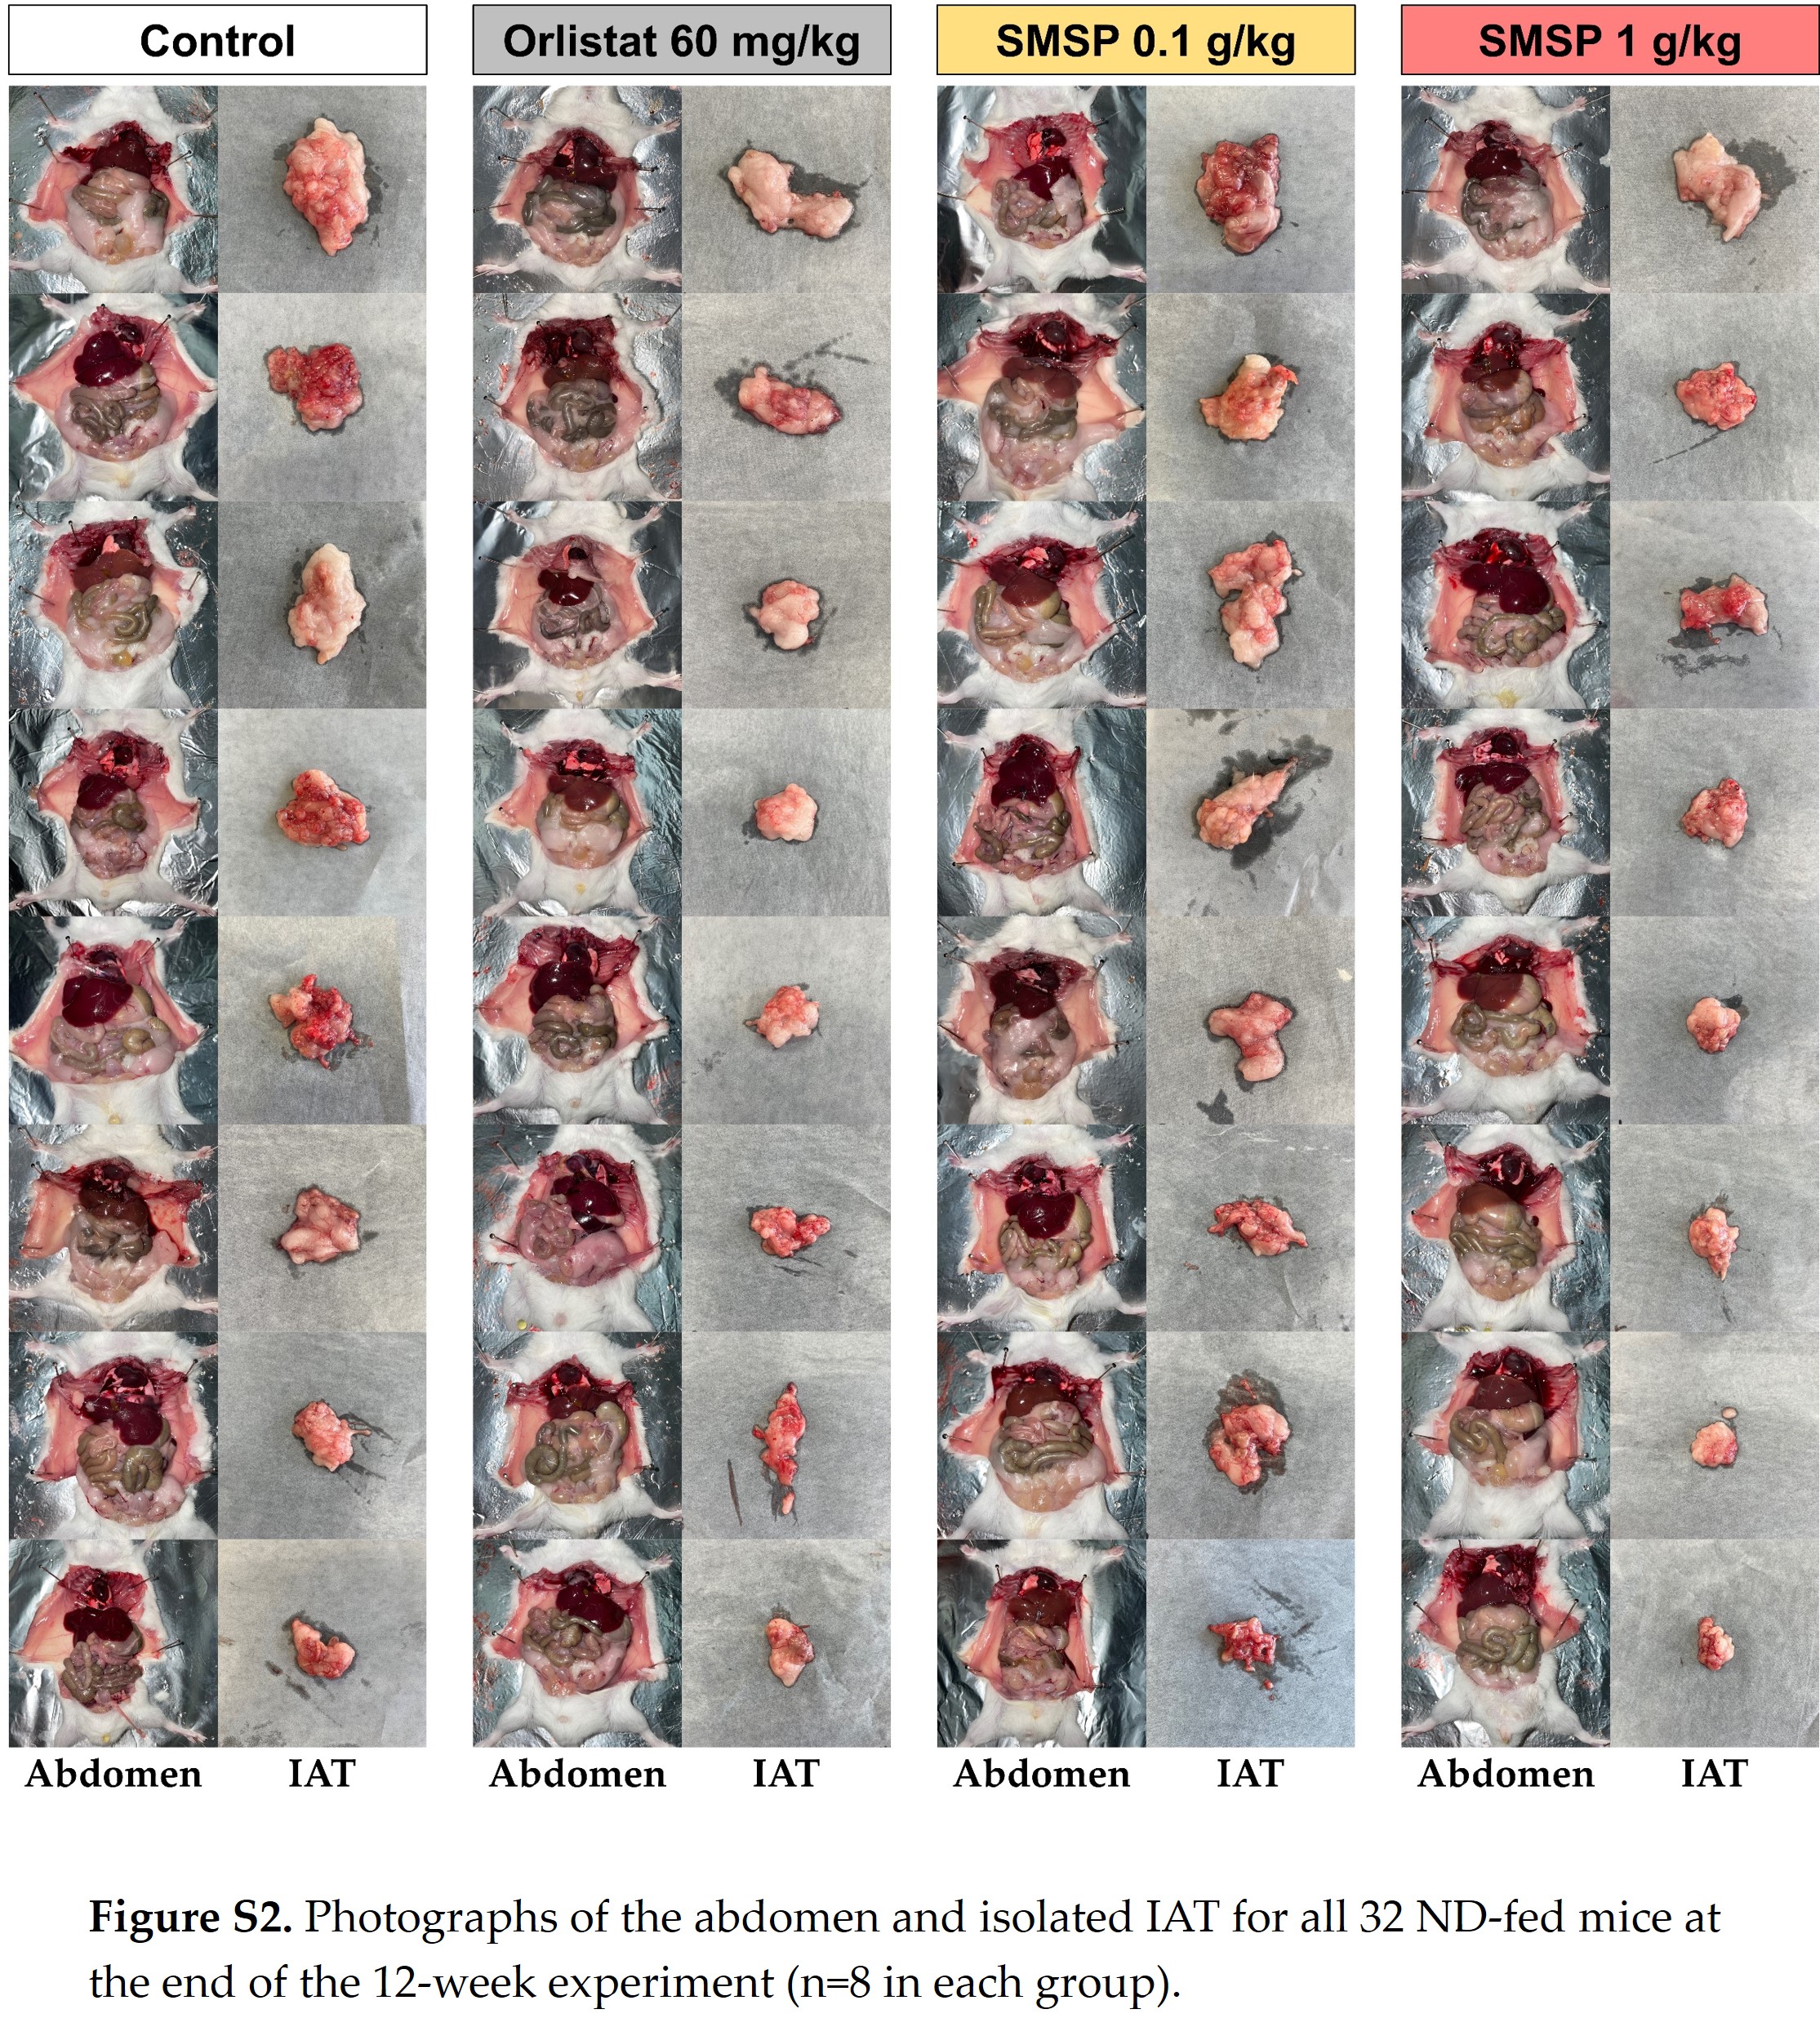

Supplement: Supplementary file 2 [file supplementary › Figure S2.jpg]

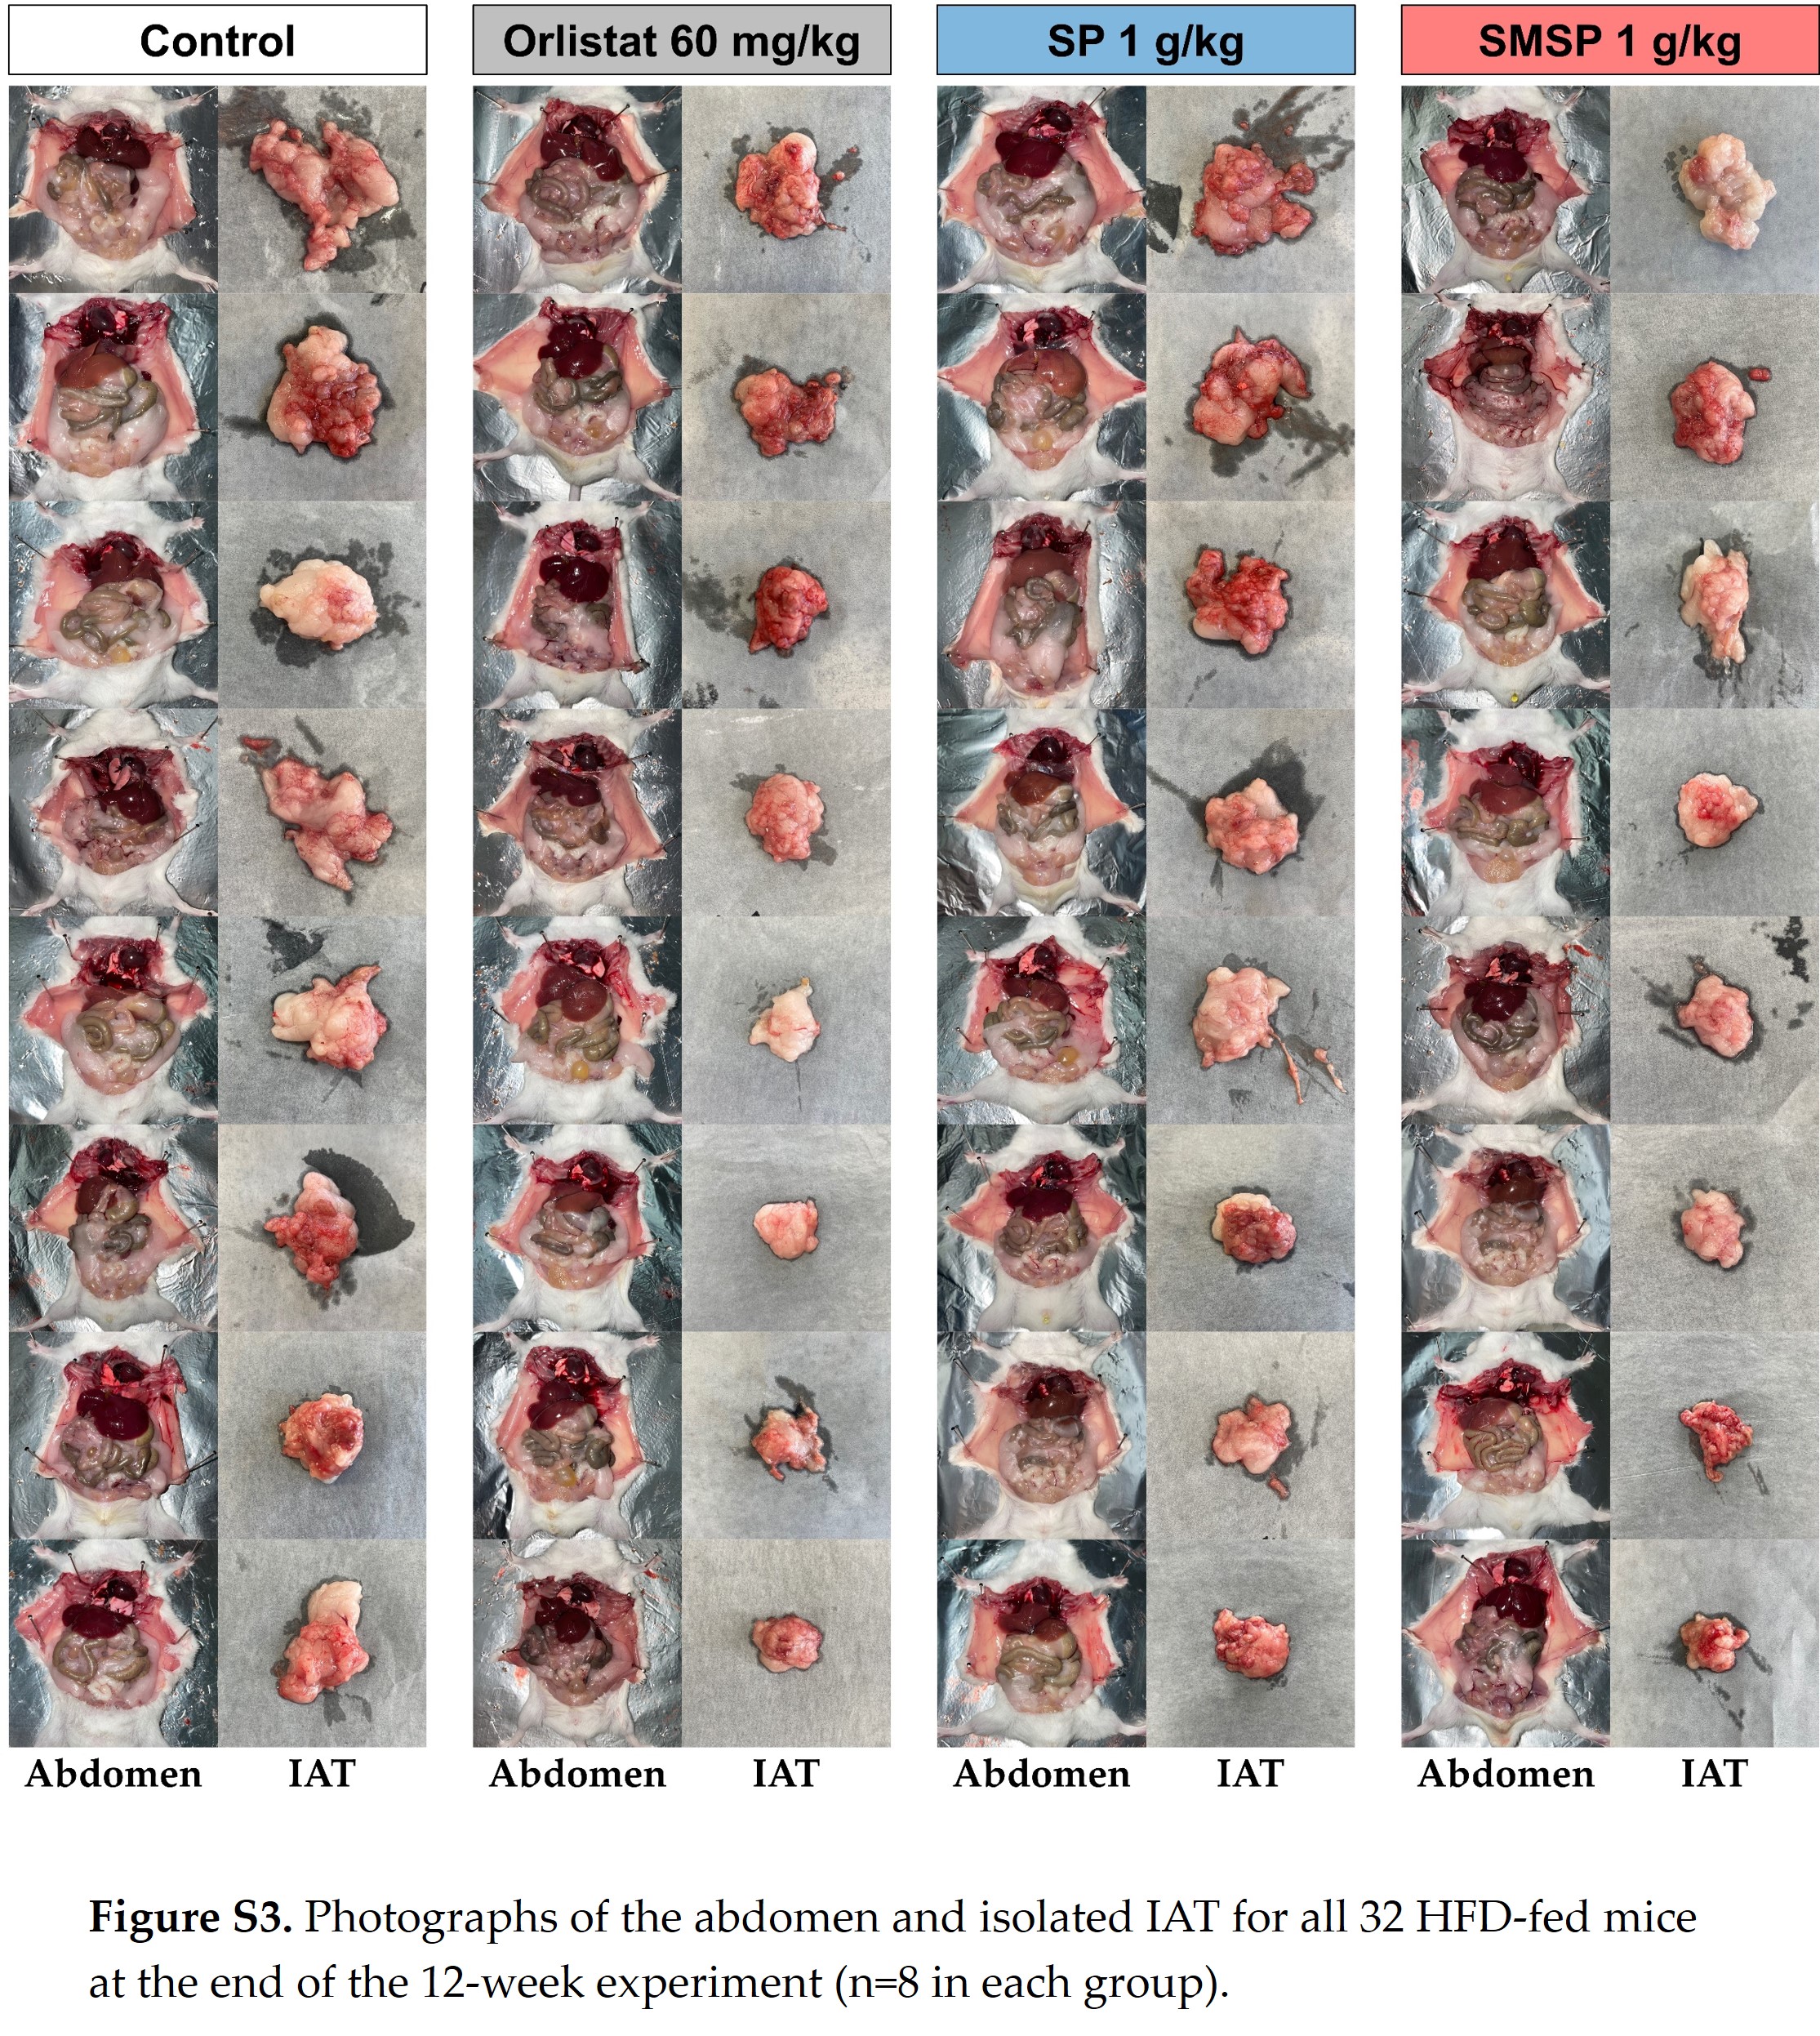

Supplement: Supplementary file 2 [file supplementary › Figure S3.jpg]

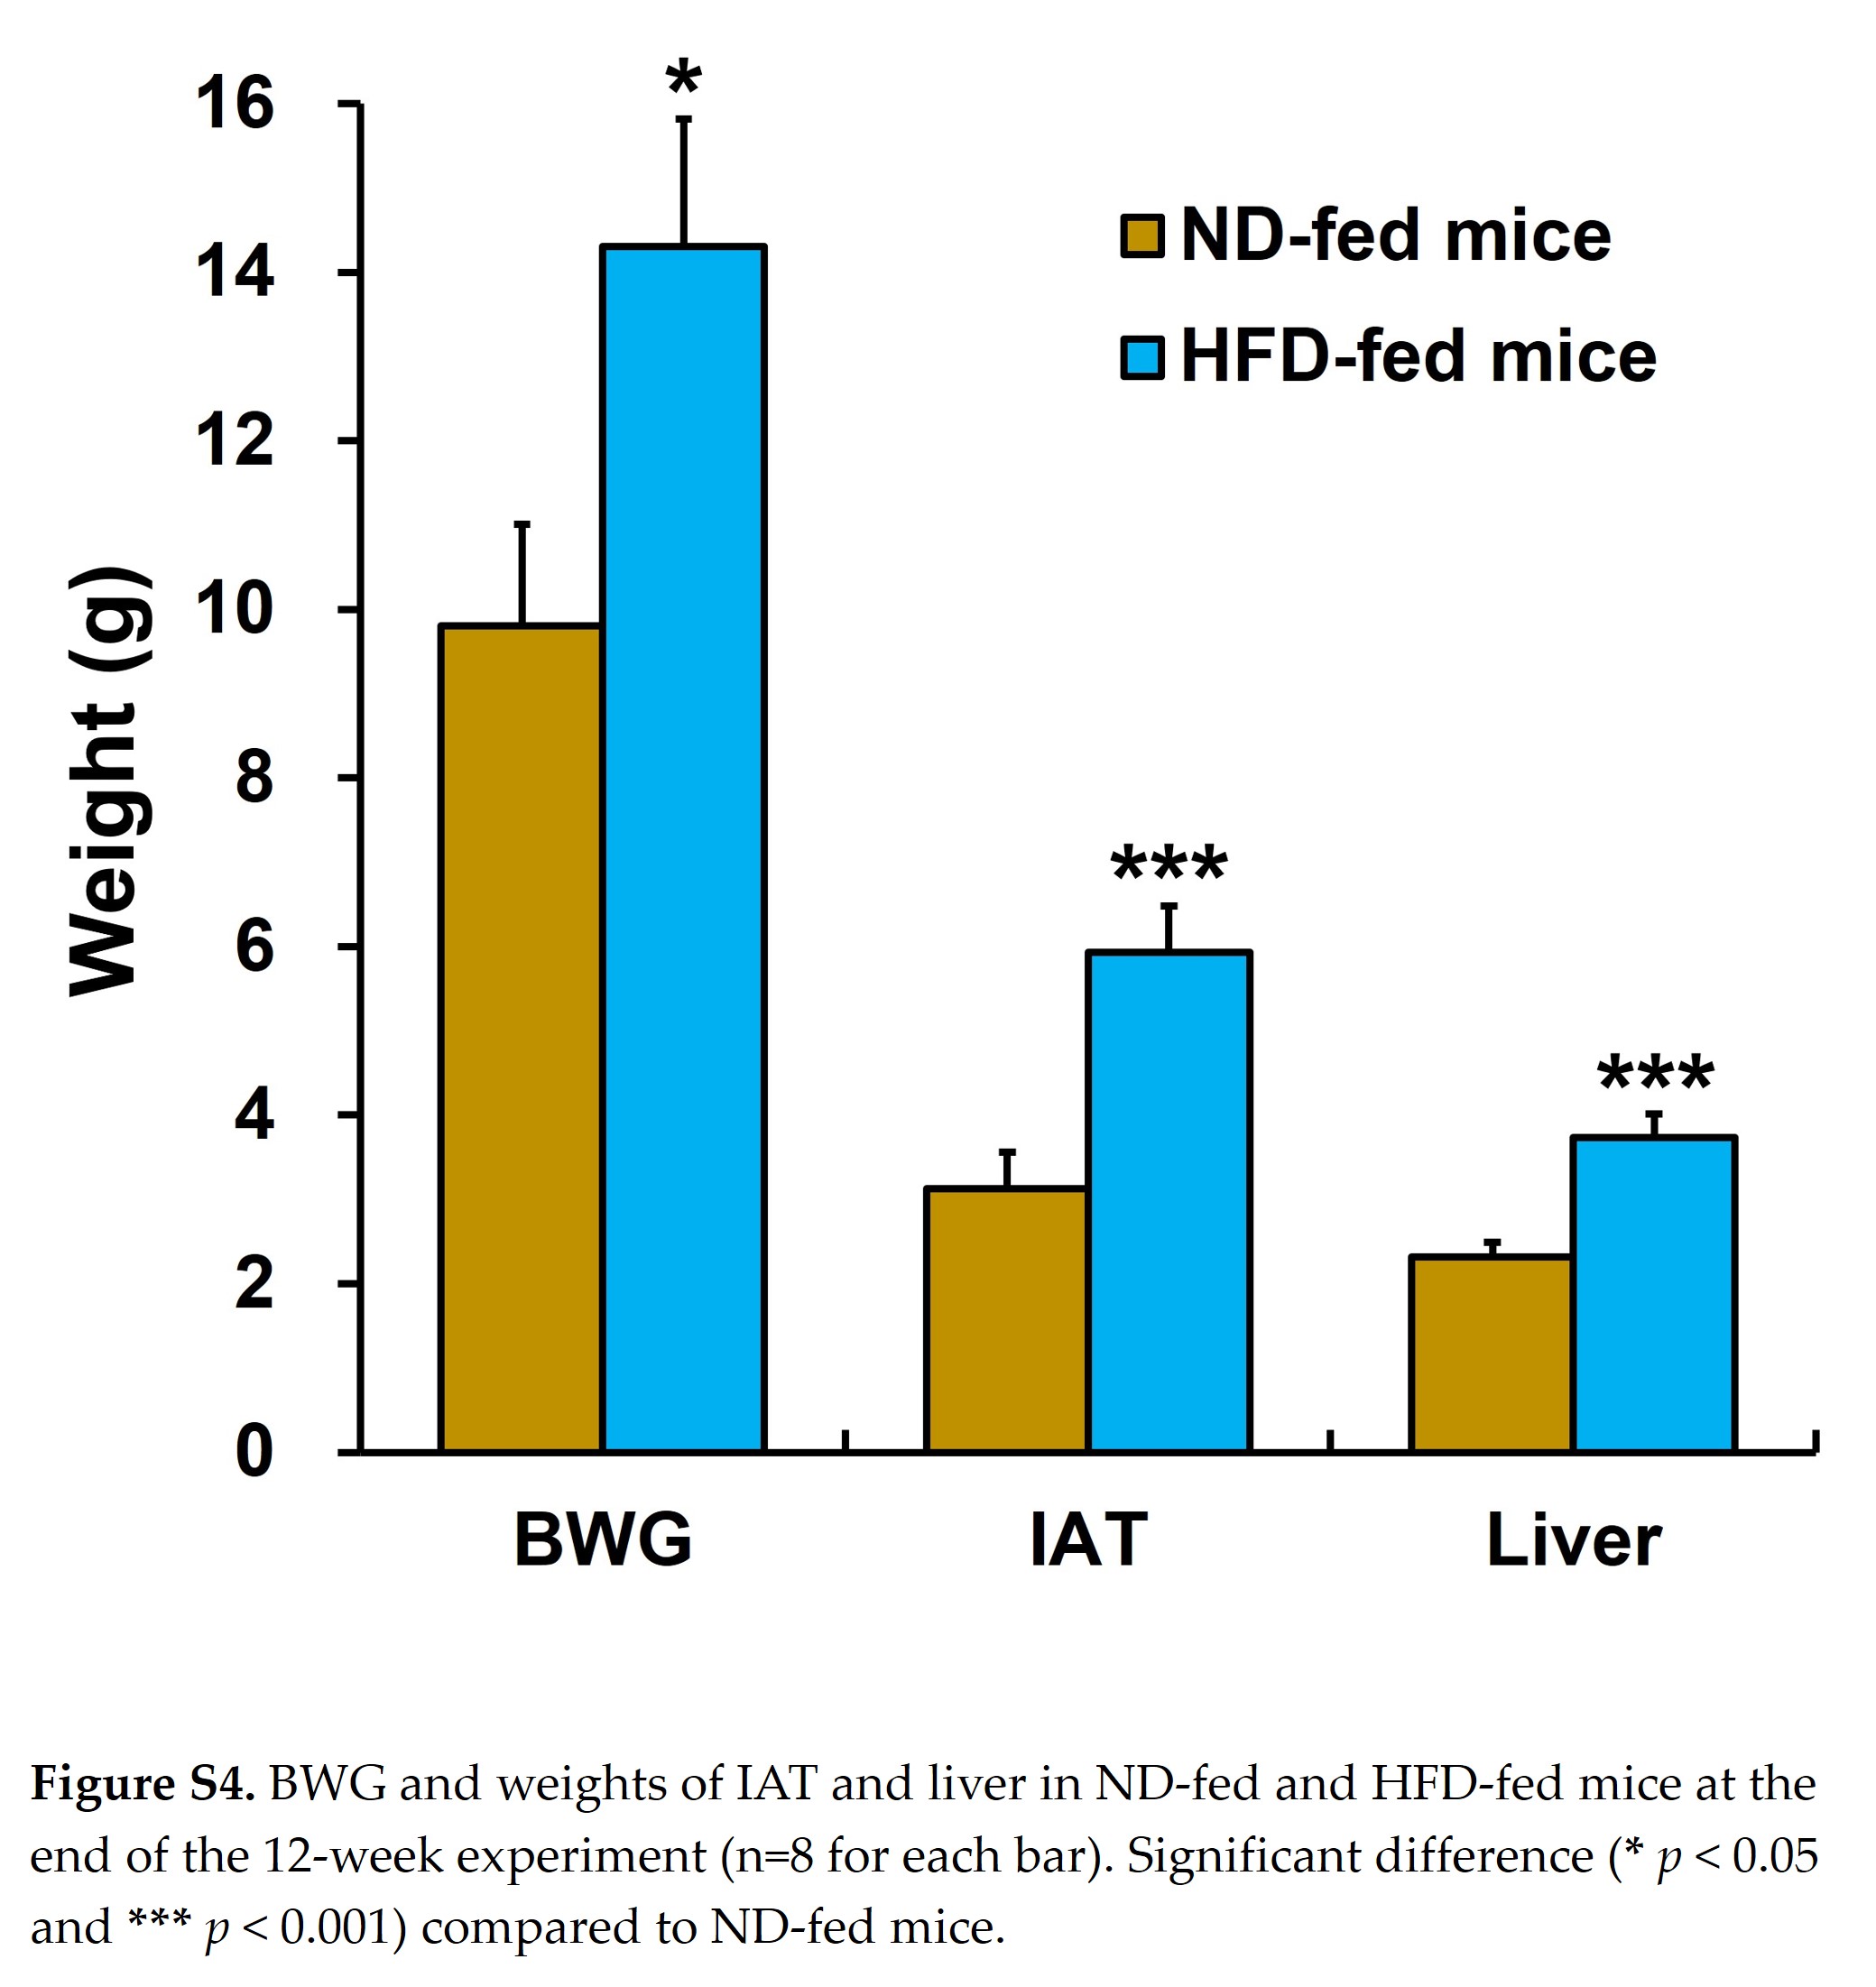

Supplement: Supplementary file 2 [file supplementary › Figure S4.jpg]

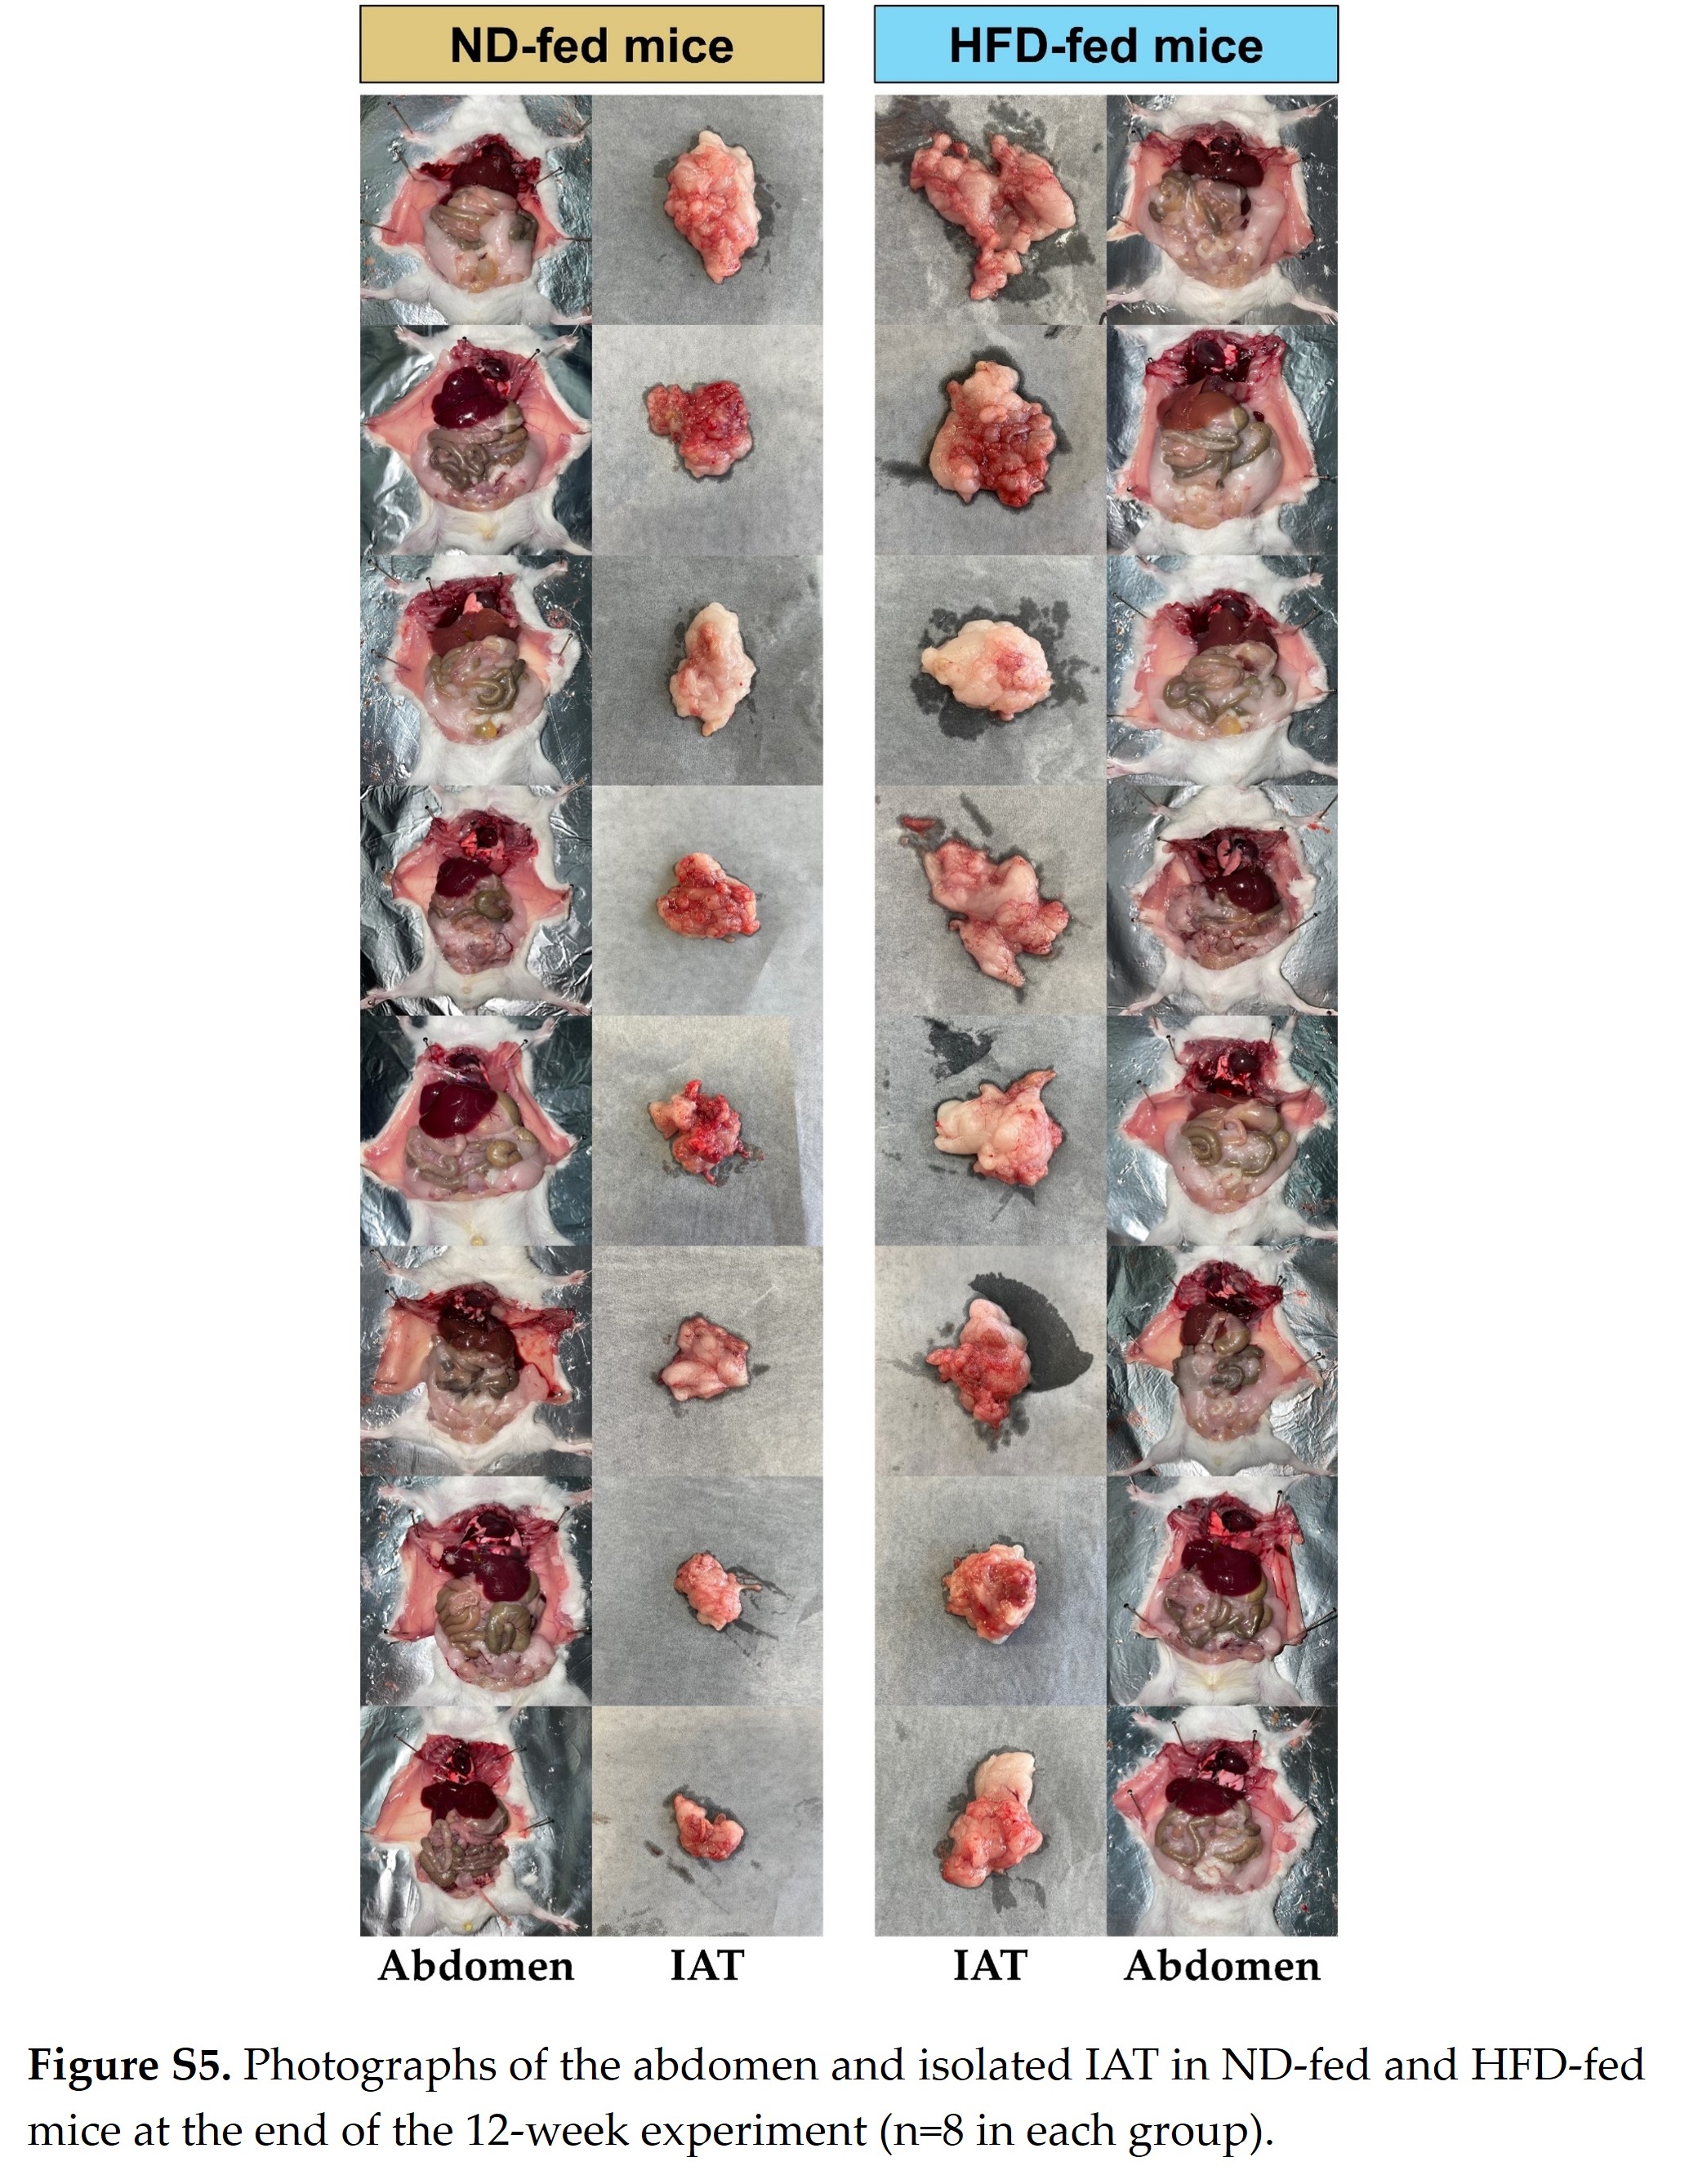

Supplement: Supplementary file 2 [file supplementary › Figure S5.jpg]

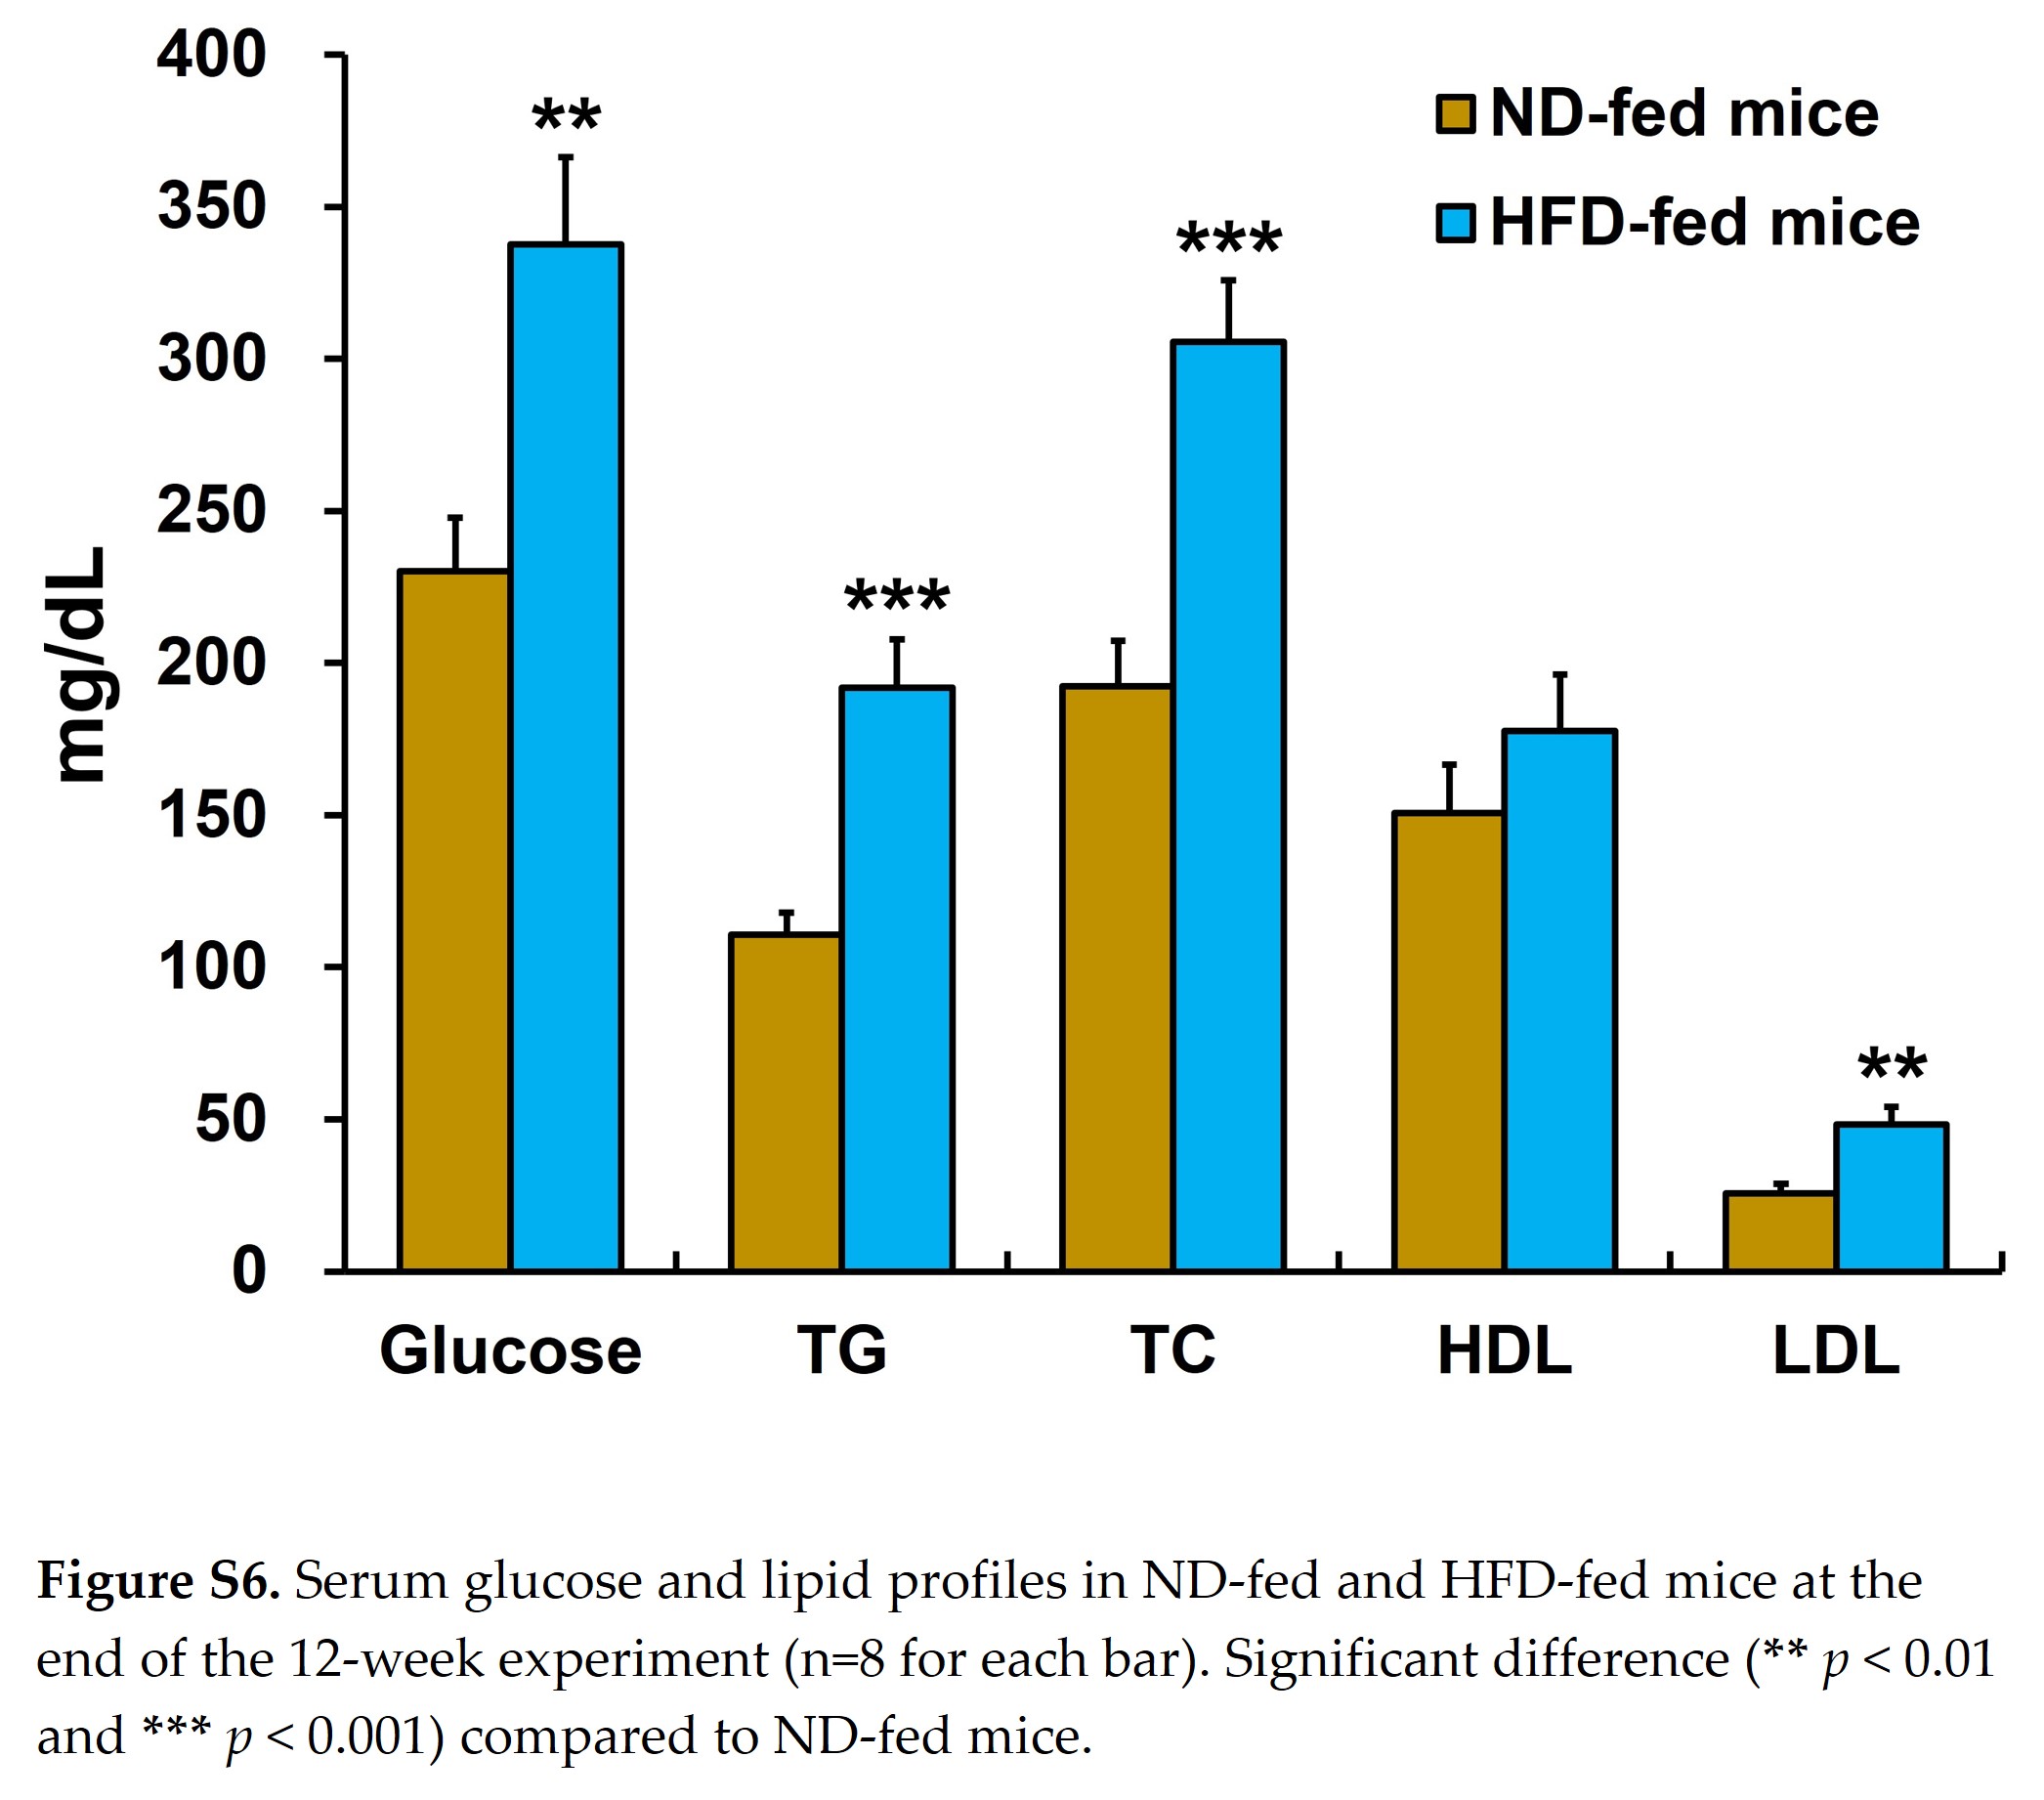

Supplement: Supplementary file 2 [file supplementary › Figure S6.jpg]

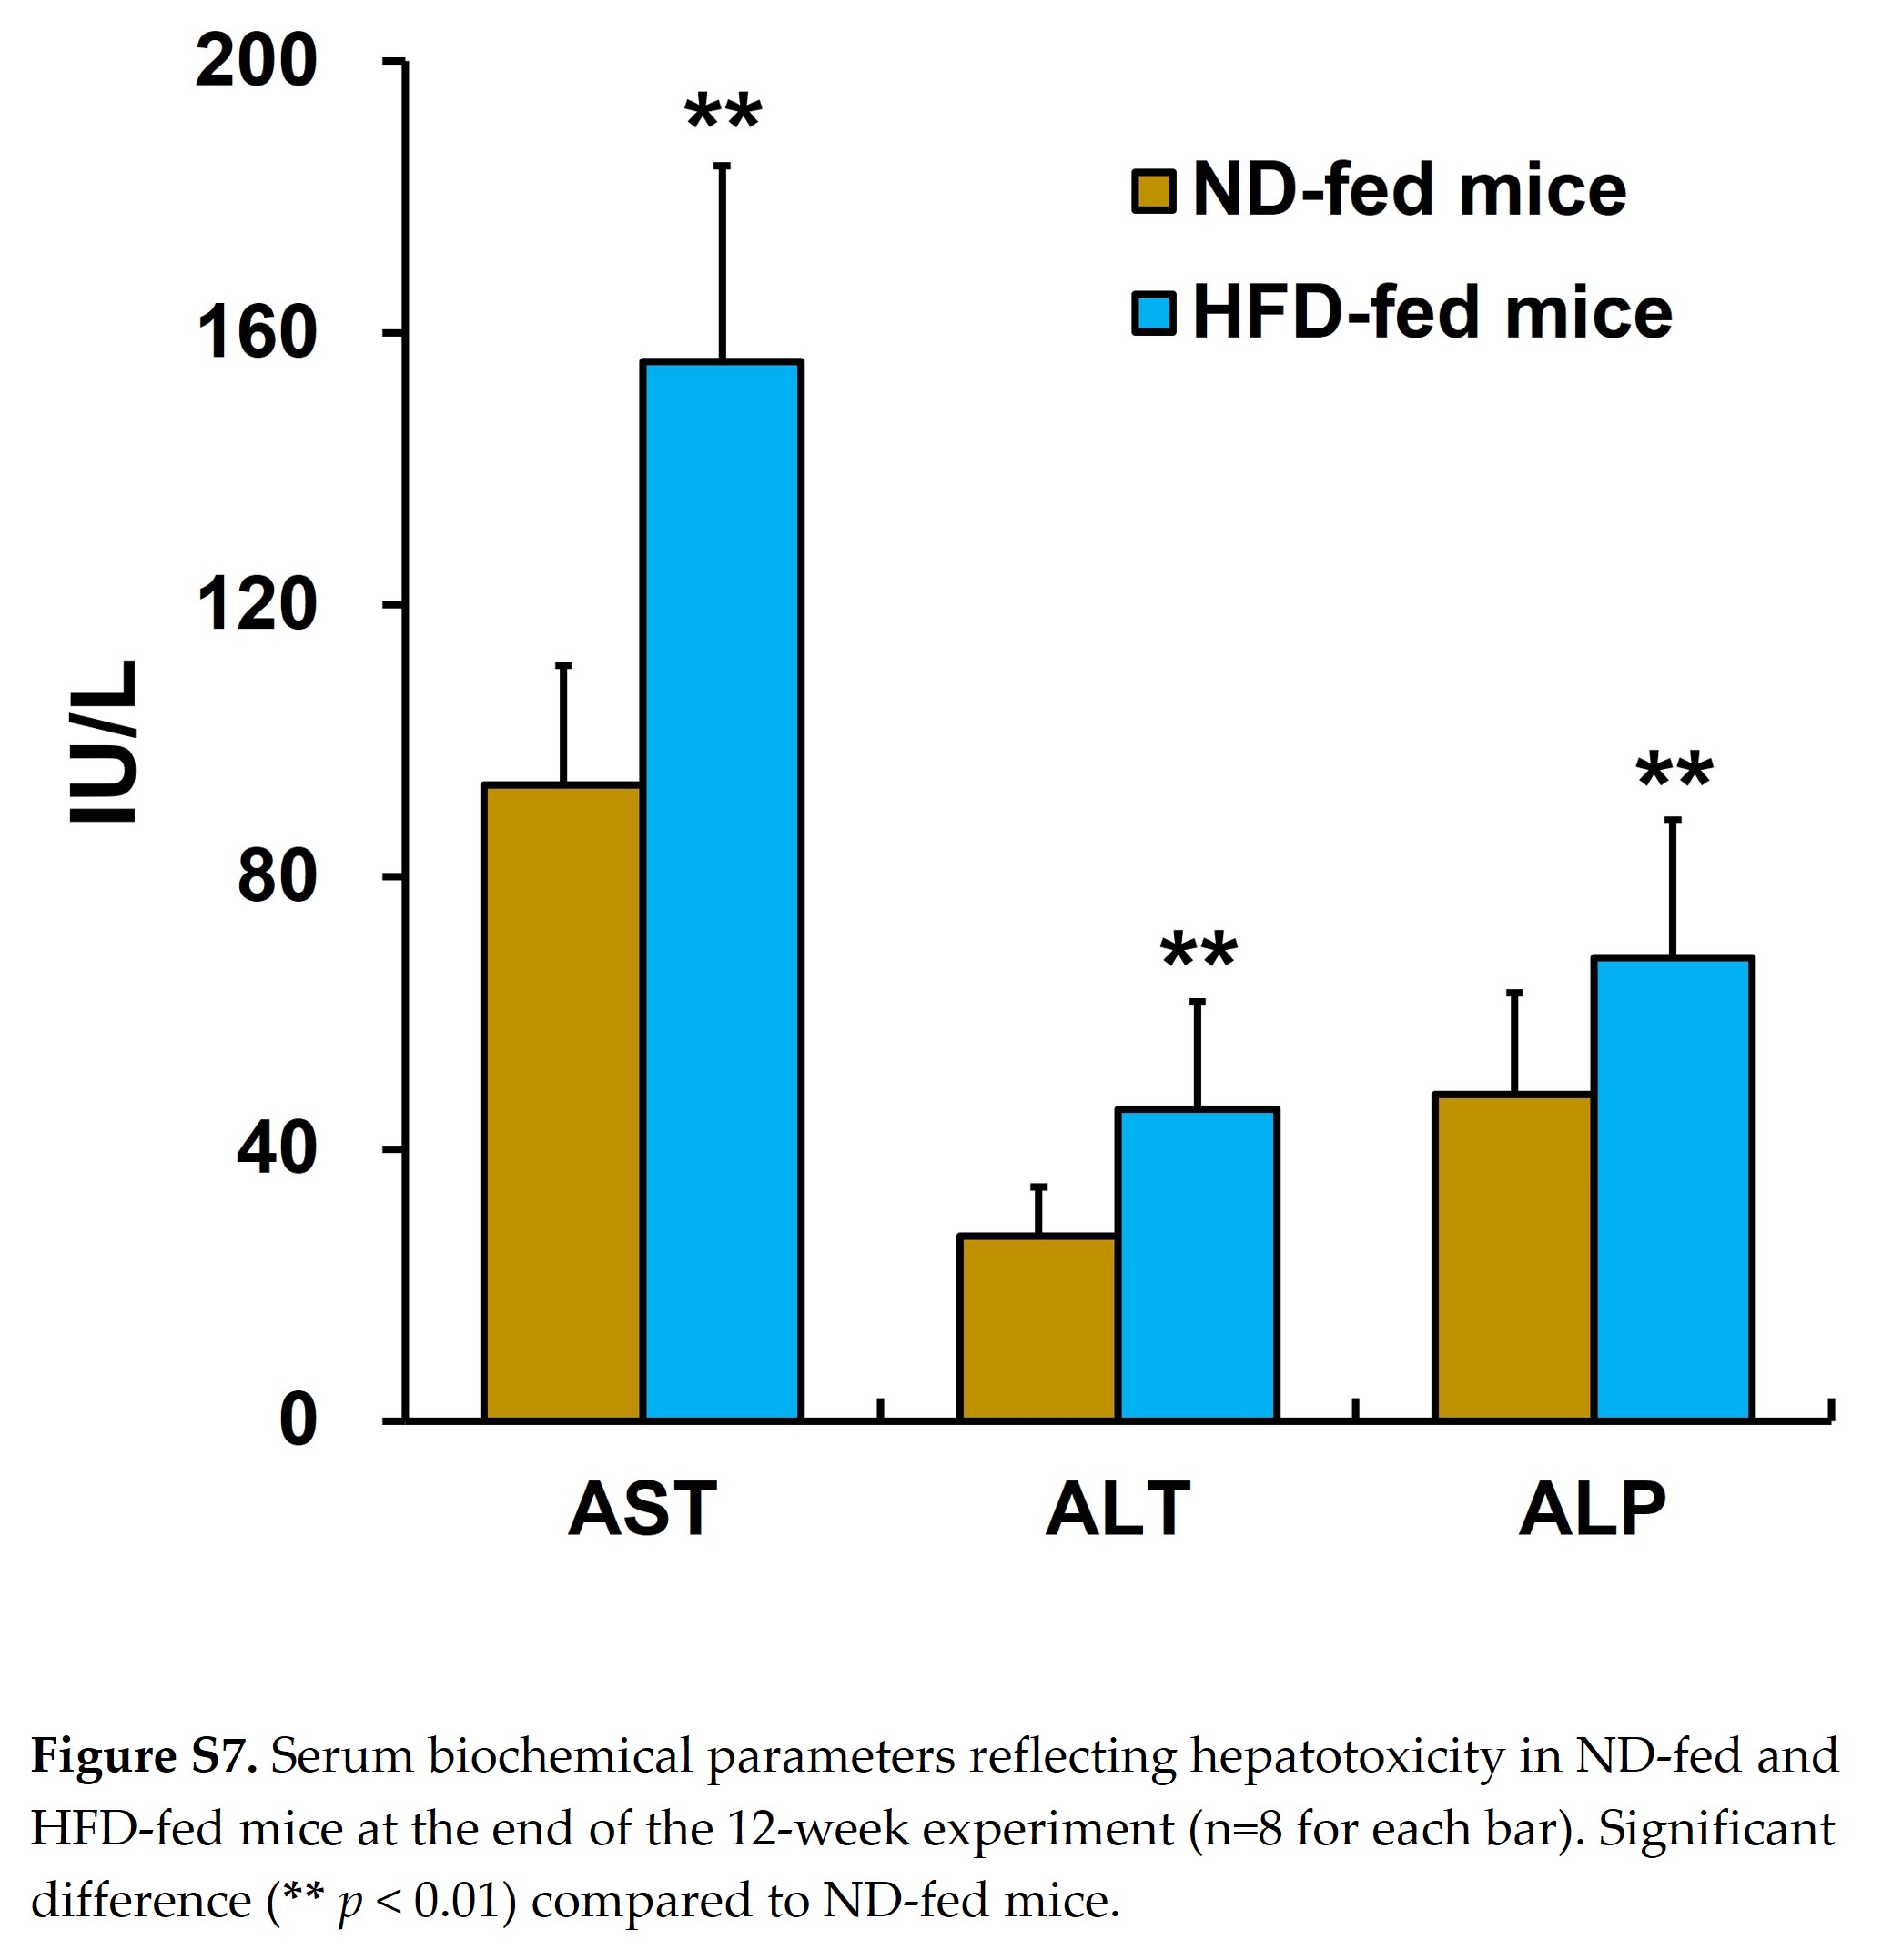

Supplement: Supplementary file 2 [file supplementary › Figure S7.jpg]
